# Supplementary material
Source: PubMed Central journal article supplement (PMC4393776)
Supplement: NIHMS662473-supplement-125_2015_3514_MOESM1_ESM.pdf [file NIHMS662473-supplement-125_2015_3514_MOESM1_ESM.pdf]

## **The Teddy Study Group**

**Colorado Clinical Center:** Marian Rewers, M.D., Ph.D., PI<sup>1,4,5,6,10,11</sup>, Kimberly Bautista<sup>12</sup>, Judith Baxter<sup>9,10,12,15</sup>, Ruth Bedoy<sup>2</sup>, Patricia Gesualdo<sup>2,6,12,14,15</sup>, Michelle Hoffman<sup>12,13,14</sup>, Rachel Karban<sup>12</sup>, Edwin Liu, M.D.<sup>13</sup>, Jill Norris, Ph.D.<sup>2,3,12</sup>, Kathleen Waugh<sup>6,7,12,15</sup>, Adela Samper-Imaz, Andrea Steck, M.D.<sup>3,14</sup>. University of Colorado, Anschutz Medical Campus, Barbara Davis Center for Childhood Diabetes.

**Georgia/Florida Clinical Center:** Jin-Xiong She, Ph.D., PI<sup>1,3,4,11</sup>, †, Desmond Schatz, M.D.\*<sup>4,5,7,8</sup>, Diane Hopkins<sup>12</sup>, Leigh Steed<sup>12,13,14,15</sup>, Jamie Thomas\*<sup>6,12</sup>, Katherine Silvis<sup>2</sup>, Michael Haller, M.D.\*<sup>14</sup>, Meena Shankar\*<sup>2</sup>, Eleni Sheehan\*, Melissa Gardiner, Richard McIndoe, Ph.D., Haitao Liu, M.D. †, John Nechtman†, Ashok Sharma, Joshua Williams, Gabriela Foghis, Stephen W. Anderson, M.D.^. Medical College of Georgia, Georgia Regents University. \*University of Florida, †Jinfiniti Biosciences LLC, Augusta, GA, ^Pediatric Endocrine Associates, Atlanta, GA.

**Germany Clinical Center:** Anette G. Ziegler, M.D., PI<sup>1,3,4,11</sup>, Andreas Beyerlein Ph.D.<sup>2</sup>, Ezio Bonifacio Ph.D.\*<sup>5</sup>, Michael Hummel, M.D.<sup>13</sup>, Sandra Hummel, Ph.D.<sup>2</sup>, Kristina Foterek<sup>¥2</sup>, Mathilde Kersting, Ph.D.¥<sup>2</sup>, Annette Knopff<sup>7</sup>, Sibylle Koletzko, M.D.¶<sup>13</sup>, Claudia Peplow<sup>12</sup>, Roswith Roth, Ph.D.<sup>9</sup>, Joanna Stock<sup>9,12</sup>, Elisabeth Strauss<sup>12</sup>, Katharina Warncke, M.D.<sup>14</sup>, Christiane Winkler, Ph.D.<sup>2,12,15</sup>. Forschergruppe Diabetes e.V. and Institute of Diabetes Research, Helmholtz Zentrum München, and Klinikum rechts der Isar, Technische Universität München. \*Center for Regenerative Therapies, TU Dresden, ¶Dr. von Hauner Children's Hospital, Department of Gastroenterology, Ludwig Maximilians University Munich, ¥Research Institute for Child Nutrition, Dortmund.

**Finland Clinical Center:** Olli G. Simell, M.D., Ph.D., PI<sup>¥^1,4,11,13</sup>, Jorma Toppari, M.D., Ph.D., Co-PI<sup>¥4,11,14</sup>, Annika Adamsson, Ph.D.¥<sup>12</sup>, Heikki Hyöty, M.D., Ph.D.\*<sup>±6</sup>, Jorma Ilonen, M.D., Ph.D.¥<sup>¶13</sup>, Miia Kähönen<sup>μ¶</sup>, Mikael Knip, M.D., Ph.D.\*<sup>±5</sup>, Annika Koivu<sup>¥^</sup>, Mirva Koreasalo\*<sup>±§2</sup>, Kalle Kurppa, M.D., Ph.D.\*<sup>±13</sup>, Maria Lönnrot, M.D., Ph.D.\*<sup>±6</sup>, Elina Mäntymäki<sup>¥^</sup>, Katja Multasuo<sup>μ¶</sup>, Juha Mykkänen, Ph.D.<sup>^¥3</sup>, Tiina Niininen<sup>±\*12</sup>, Mia Nyblom\*<sup>±</sup>, Jenna Rautanen<sup>±§</sup>, Anne Riikonen\*<sup>±</sup>, Minna Romo<sup>¥^</sup>, Barbara Simell, Satu Simell, M.D., Ph.D.\*<sup>±13</sup>, Tuula Simell, Ph.D., Ville Simell<sup>^¥13</sup>, Maija Sjöberg<sup>¥^12,14</sup>, Aino Stenius<sup>μ¶12</sup>, Eeva Varjonen<sup>¥^12</sup>, Riitta Veijola, M.D., Ph.D.<sup>μ¶14</sup>, Suvi M. Virtanen, M.D., Ph.D.\*<sup>±§2</sup>, Mari Åkerlund\*<sup>±§</sup>. ¥University of Turku, \*University of Tampere, μUniversity of Oulu, ^Turku University Hospital, ±Tampere University Hospital, ¶Oulu University Hospital, §National Institute for Health and Welfare, Finland, ¶University of Kuopio.

**Sweden Clinical Center:** Åke Lernmark, Ph.D., PI<sup>1,3,4,5,6,8,10,11,15</sup>, Daniel Agardh, M.D., Ph.D.<sup>13</sup>, Carin Andrén Aronsson<sup>2,13</sup>, Maria Ask, Jenny Bremer, Ulla-Marie Carlsson, Corrado Cilio, Ph.D., M.D.<sup>5</sup>, Camilla Ekstrand, Emelie Ericson-Hallström<sup>2</sup>, Lina Fransson, Thomas Gard, Joanna Gerardsson, Rasmus Håkansson, Monica Hansen, Gertie Hansson<sup>12</sup>, Susanne Hyberg, Fredrik Johansen, Berglind Jonasdottir M.D., Linda Jonsson, Helena Helena Elding Larsson M.D., Ph.D.<sup>6,14</sup>, Barbro Lernmark, Ph.D., Maria Månsson-Martinez, Maria Markan, Theodosia Massadakis, Jessica Melin<sup>12</sup>, Zeliha Mestan, Kobra Rahmati, Anita Ramelius, Falastin Salami, Monica Sedig Järvirova, Sara Sibthorpe, Birgitta Sjöberg, Ulrica Swartling, Ph.D.<sup>9,12</sup>, Erika Trulsson, Carina Törn, Ph.D.<sup>3,15</sup>, Anne Wallin, Åsa Wimar<sup>12,14</sup>, Sofie Åberg. Lund University.

**Washington Clinical Center:** William A. Hagopian, M.D., Ph.D., PI<sup>1,3,4, 5, 6,7,11,13, 14</sup>, Xiang Yan, M.D., Michael Killian<sup>6,7,12,13</sup>, Claire Cowen Crouch<sup>12,14,15</sup>, Jennifer Skidmore<sup>2</sup>, Stephen Ayres, Kayleen Dunson, Diana Heaney, Rachel Hervey, Renee Kindschi, Arlene Meyer, Denise Mulenga, Elizabeth Scott, Joshua Stabbert, Nancy Williams, John Willis. Pacific Northwest Diabetes Research Institute.

**Pennsylvania Satellite Center:** Dorothy Becker, M.D., Margaret Franciscus, MaryEllen Dalmagro-Elias Smith<sup>2</sup>, Ashi Daftary, M.D., Mary Beth Klein, Chrystal Yates. Children's Hospital of Pittsburgh of UPMC.

**Data Coordinating Center:** Jeffrey P. Krischer, Ph.D., PI<sup>1,4,5,10,11</sup>, Michael Abbondandolo, Sarah Austin-Gonzalez, Rasheedah Brown<sup>12,15</sup>, Brant Burkhardt, Ph.D.<sup>5,6</sup>, Martha Butterworth<sup>2</sup>, David Cuthbertson, Christopher Eberhard, Steven Fiske<sup>9</sup>, Dena Garcia, Veena Gowda, David Hadley, Ph.D.<sup>3,13</sup>, Hye-Seung Lee, Ph.D.<sup>1,2,13,15</sup>, Shu Liu, Xiang Liu, Ph.D.<sup>2,9,12</sup>, Kristian Lynch, Ph.D.<sup>5,6,9,15</sup>, Jamie Malloy, Cristina McCarthy<sup>12,15</sup>, Wendy McLeod<sup>2,5,6,13,15</sup>, Chris Shaffer, Laura Smith, Ph.D.<sup>9,12</sup>, Susan Smith<sup>12,15</sup>, Roy Tamura, Ph.D.<sup>1,2,13</sup>, Ulla Uusitalo, Ph.D.<sup>2,15</sup>, Kendra Vehik, Ph.D.<sup>4,5,6,14,15</sup>, Earnest Washington, Jimin Yang, Ph.D., R.D.<sup>2,15</sup>. University of South Florida.

**Project scientist:** Beena Akolkar, Ph.D.<sup>1,3,4,5, 6,7,10,11</sup>. National Institutes of Diabetes and Digestive and Kidney Diseases.

**Other contributors:** Kasia Bourcier, Ph.D.<sup>5</sup>, National Institutes of Allergy and Infectious Diseases. Thomas Briese, Ph.D.<sup>6,15</sup>, Columbia University. Suzanne Bennett Johnson, Ph.D.<sup>9,12</sup>, Florida State University. Steve Oberste, Ph.D.<sup>6</sup>, Centers for Disease Control and Prevention. Eric Triplett, Ph.D.<sup>6</sup>, University of Florida.

**Autoantibody Reference Laboratories:** Liping Yu, M.D.<sup>^ 5</sup>, Dongmei Miao, M.D.<sup>^</sup>, Polly Bingley, M.D., FRCP<sup>\*5</sup>, Alistair Williams<sup>\*</sup>, Kyla Chandler<sup>\*</sup>, Saba Rokni<sup>\*</sup>, Joanna Boldison<sup>\*</sup>, Jacob Butterly<sup>\*</sup>, Jessica Broadhurst<sup>\*</sup>, Gabriella Carreno<sup>\*</sup>, Claire Caygill<sup>\*</sup>, Rachel Curnock<sup>\*</sup>, Peter Easton<sup>\*</sup>, Ivey Geoghan<sup>\*</sup>, Julia Goode<sup>\*</sup>, Anna Long<sup>\*</sup>, Molly Payne<sup>\*</sup>, James Pearson<sup>\*</sup>, Charles Reed<sup>\*</sup>, Sophie Ridewood<sup>\*</sup>, Rebecca Wyatt<sup>\*</sup>.  
<sup>^</sup>Barbara Davis Center for Childhood Diabetes, University of Colorado Denver,  
<sup>\*</sup>School of Clinical Sciences, University of Bristol UK.

**Cortisol Laboratory:** Elisabeth Aardal Eriksson, M.D., Ph.D., Ing-Marie Lundgren, Ewa Lönn Karlsson, Dzeneta Nezirevic Dernroth, Ph.D. Department of Clinical Chemistry, Linköping University Hospital, Linköping, Sweden.

**Dietary Biomarkers Laboratory:** Iris Erlund, Ph.D.<sup>2</sup>, Irma Salminen, Jouko Sundvall, Jaana Leiviskä, Mari Lehtonen, Ph.D. National Institute for Health and Welfare, Helsinki, Finland.

**HbA1c Laboratory:** Randie R. Little, Ph.D., Alethea L. Tennill. Diabetes Diagnostic Laboratory, Dept. of Pathology, University of Missouri School of Medicine.

**HLA Reference Laboratory:** Henry Erlich, Ph.D.<sup>3</sup>, Steven J. Mack, Ph.D., Anna Lisa Fear. Center for Genetics, Children's Hospital Oakland Research Institute.

**Metabolomics Laboratory:** Oliver Fiehn, Ph.D., Bill Wikoff, Ph.D., Brian Defelice, Dmitry Grapov, Ph.D., Tobias Kind, Ph.D., Mine Palazoglu, Luis Valdiviez, Benjamin Wancewicz, Gert Wohlgemuth, Joyce Wong. UC Davis Metabolomics Center.

**Microbiome and Viral Metagenomics Laboratory:** Joseph F. Petrosino, Ph.D.<sup>6</sup>. Alkek Center for Metagenomics and Microbiome Research, Department of Molecular Virology and Microbiology, Baylor College of Medicine.

**OGTT Laboratory:** Santica M. Marcovina, Ph.D., Sc.D., Vinod P. Gaur, Ph.D., Northwest Lipid Metabolism and Diabetes Research Laboratories, University of Washington.

**Proteomics Laboratory:** Richard Smith, Ph.D., Thomas Metz, Ph.D. Pacific Northwest National Laboratory.

**Repository:** Heather Higgins, Sandra Ke. NIDDK Biosample Repository at Fisher BioServices.

**RNA Laboratory and Gene Expression Laboratory:** Jin-Xiong She, Ph.D., PI<sup>1,3,4,11</sup>, Richard McIndoe, Ph.D., Haitao Liu, M.D., John Nechtman, Yansheng Zhao, Na Jiang, M.D. Jinfiniti Biosciences, LLC.

**SNP Laboratory:** Stephen S. Rich, Ph.D.<sup>3</sup>, Wei-Min Chen, Ph.D.<sup>3</sup>, Suna Onengut-Gumuscu, Ph.D.<sup>3</sup>, Emily Farber, Rebecca Roche Pickin, Ph.D., Jordan Davis, Dan Gallo, Jessica Bonnie, Paul Campolieto. Center for Public Health Genomics, University of Virginia.

***Committees:***

<sup>1</sup>Ancillary Studies, <sup>2</sup>Diet, <sup>3</sup>Genetics, <sup>4</sup>Human Subjects/Publicity/Publications, <sup>5</sup>Immune Markers, <sup>6</sup>Infectious Agents, <sup>7</sup>Laboratory Implementation, <sup>8</sup>Maternal Studies, <sup>9</sup>Psychosocial, <sup>10</sup>Quality Assurance, <sup>11</sup>Steering, <sup>12</sup>Study Coordinators, <sup>13</sup>Celiac Disease, <sup>14</sup>Clinical Implementation, <sup>15</sup>Quality Assurance Subcommittee on Data Quality.
